# Supplementary material for: Staphylococcus aureus Cell Wall Phenotypic Changes Associated with Biofilm Maturation and Water Availability: A Key Contributing Factor for Chlorine Resistance
Source: MDPI journal article supplement (doi:10.3390/ijms24054983), 2023-03-05
Supplement: s1 [file s1]

## **Supplementary Methods: Proteomics analysis of biofilm**

### *Protein Extraction and Fractionation*

Planktonic bacteria were pooled from three independent growth of 24 h *Staphylococcus aureus* cultures and were mixed with lysis buffer containing 100 mM Triethylammonium bicarbonate (TEAB; Sigma-Aldrich, St. Louis, MO, USA) pH 8.5 and 1% (w/v) sodium deoxycholate (Sigma-Aldrich) at 10:1 ratio (supernatant: lysis buffer), while *S. aureus* biofilms (3-day biofilm, 12-day biofilm and DSB) coated coupons ( $n = 24$ ) were washed to remove non-adherent cells and coupons individually placed in 2 mL of phosphate-buffered saline (PBS) and lysis buffer and incubated overnight with gentle shaking at 4°C. Samples were probe sonicated in an ice-cold environment (Sonic Ruptor, Omni International, Kennesaw, Georgia, GA, USA) for 2 min at 50% power and 70% pulses. The samples were centrifuged at 12,000×  $g$  for 10 min and the supernatant was filtered through a 10 kDa molecular weight cut-off (MWCO) ultra-membrane filter tube (Sigma-Aldrich) before centrifugation at 4000×  $g$  for 20 min. Protein samples were washed three times with PBS to remove TSB and lysis buffer and further concentrated using a 3 KDa MWCO filter tube (Sigma Aldrich).

The BCA protein assay (Thermo Fisher Scientific, Waltham, MA, USA) was used to measure protein concentration at 562 nm wavelength as per the manufacturer's instructions.

### *Protein Reduction, Alkylation, and Digestion*

A total of 40 µg protein of each biological replicate was reduced with 5 mM DTT for 15 min at RT and alkylated with 10 mM iodoacetamide (IAA) in the dark for 30 min at RT. Alkylated samples were diluted with 100 mM TEAB pH 8.5. Samples were digested overnight at RT by the addition of Lys-C at a ratio of 1:30 followed by the addition of trypsin at a ratio of 1:30 for 5.5 h at 37°C. Samples were adjusted to 1% (v/v) TFA, and the precipitated deoxycholate was removed by centrifugation. Samples were centrifuged at 14,100×  $g$  and desalted with 0.2% TFA washing using SDB-RPS (3M-Empore) Stage Tips (Thermo Fisher Scientific). Samples were eluted with 5% ammonium hydroxide in 80% acetone and centrifuged at 1000×  $g$  for 5 min, vacuum dried and stored at -20°C until further processing.

### *TMT Labelling and High pH Fractionation*

TMT10plex™ Isobaric Label Reagent Set (Thermo Fisher Scientific) was used. TMT reagents (0.8 mg) were dissolved in acetone (85 µL) of which 41 µL was added to the reconstituted (100 µL of 100 mM TEAB pH 8.5) samples and incubated for 1 h at RT. A volume of 8 µL of 5% hydroxylamine was added to each TMT-labelled sample and incubated for 15 min at RT. A volume of 2 µL of each labelled sample was pooled and vacuum dried and reconstituted in 30 µL 0.1% formic acid (FA) (Merck, Kenilworth, NJ, USA) solution, centrifuged for 5 min at 14,000× g and analysed with mass spectrometer (for detailed information see nanoLC-ESI-MS/MS using Orbitrap Elite).

Data searching was conducted using Proteome Discoverer 1.3 (for detailed information see data processing). Based on the applied normalization values from this search result an equal number of peptides were taken from each sample, pooled and vacuum dried (miVac). The dried labeled sample was resuspended in buffer A (5 mM ammonia, pH 10.5) and fractionated by high pH reverse phase-high pressure liquid chromatography (RP-HPLC; Agilent Technologies, Santa Clara, CA, USA). The dried labeled sample was resuspended in buffer A. After sample loading and washing with 97% buffer A for 10 min, the concentration of buffer B (5 mM ammonia solution with 90% Acetone, pH 10.5) was increased from 3% to 30% for 55 min; 70% for 10 min; 90% for 5 min at a flow rate of 300 µL/min. The eluent was collected every 2 min at the beginning until 16 min and every 1 min intervals for the remainder of the gradient. The fractionated sample was pooled into 19 fractions and dried in miVac. Finally, each fraction was resuspended in 55 µL of 0.1% FA for mass spectrometer (MS) analysis.

#### *Nanoflow LC-ESI-MS/MS*

All samples were run on two sequential mass spectrometer systems Orbitrap Elite (Thermo Fisher Scientific) and Q Exactive (Thermo Fisher Scientific).

#### Nanoflow LC-ESI-MS/MS Using Orbitrap Elite

An Orbitrap Elite (Thermo Fisher Scientific) mass spectrometer equipped with PicoView 550 Nanospray Source (New Objectives), an Eksigent ultra-pressure liquid chromatography (UPLC) system (AB SCIEX) consisting of an ekspert™ nanoLC 425 UPLC pump and ekspert™ nanoLC 400 (Thermo Fisher Scientific) autosampler was used for acquiring data. 20 µL of each fraction was loaded onto a self-packed 100 µm × 3.5 cm trap column with Halo® 2.7 µm 160 Å ES-C18 (Advanced Materials Technology, Wilmington, DE, USA) and desalted with loading buffer [0.1% FA] at a flow rate of 4 µL/min for 10 min. Peptides were eluted onto a self-packed analytical column 100 µm × 30 cm with Halo® 2.7 µm 160 Å ES-C18 (Advanced Materials Technology) with the linear gradients of mobile phase A (0.1% FA/5% DMSO) and mobile phase B (0.1% FA/5% DMSO) starting with B (1–10%) for 0.1 min, B (10–20%) for 52 min, B (20–32%) for 48 min followed by (32–43%) for 20 min with a flow rate of 450 nL/min across the gradient. The eluent from the trap was diluted with 100 nL/min of buffer A before

reaching the analytical column. The peptides refocused and separated over the analytical column at 60°C. Peptides were ionized by electrospray ionization, and data-dependent MS/MS acquisition was carried out using an Orbitrap Elite (Thermo Fisher Scientific) consisting of 1 full MS1 ( $R = 120$  K) scan acquisition from 380 to 1600  $m/z$ , and 15 higher energy collisional dissociation (HCD) type MS2 scans ( $R = 30$  K).

#### Nanoflow LC-ESI-MS/MS Using Q Exactive

A Q Exactive (Thermo Fisher Scientific) Mass Spectrometer equipped with Nano spray Source and Easy nLC 1000 (Thermo Fisher Scientific) was used for acquiring data. 10  $\mu$ L of each fraction was loaded onto a self-packed 100  $\mu$ m  $\times$  3.5 cm reversed-phase peptide trap with Halo<sup>®</sup> 2.7  $\mu$ m 160 Å ES-C18 (Advanced Materials Technology) desalted with 20  $\mu$ L of loading buffer (0.1% FA) and the peptide trap was then switched on-line with the analytical column a self-packed 75  $\mu$ m  $\times$  3.5 cm Halo<sup>®</sup> 2.7  $\mu$ m 160 Å ES-C18 column. Peptides were eluted with the linear gradients of mobile phase A (0.1% FA) and buffer B [100%(v/v) Acetone, 0.1%(v/v) FA] starting with (1–30%) for 110 min, B (30–85%) for 2 min followed by 85% B for 8 min with a flow rate of 300 nL/min. Peptides were ionized by electrospray ionization and data-dependent MS/MS acquisition was carried out using a Q-Exactive consisting of 1 full MS1 ( $R = 70$  K) scan acquisition from 350 to 1850  $m/z$ , and 10 HCD type MS2 scans ( $R = 70$  K).

#### *Database Search, Statistical Analysis, and Bioinformatics*

Database search, statistical analysis, and bioinformatics were performed as below. The raw data files were submitted to Proteome Discoverer (version 1.3, Thermo Fisher Scientific). The data were processed using Sequest and Mascot (Matrix Science, London, UK) against the *S. aureus* reference strain (ATCC 25923) from Genbank CP009361 and CP009362. For protein identification, the following options were used: peptide mass tolerance = 10 ppm; MS/MS tolerance = 0.1 Da; enzyme = trypsin, missed cleavage = 1; fixed modification, carbamidomethyl (C), TMT10-plex (K) and TMT10-plex (N-term); variable modification, oxidation (M), Deamidated (N, Q) and Acetyl (N-Terminus). Quantification was performed based on the peak intensities of reporter ions in the MS/MS spectra. A below 1% false discovery rate was selected as the cut-off for peptide identification. Protein quantification was based on the total intensity of the assigned peptides. After the extraction of protein ratios with Proteome Discoverer, additional processing and statistical analyses were performed using the TMTPrePro R package. BLAST search was performed using highly annotated strains *S. aureus* N315 and *S. aureus* COL. Proteins were considered upregulated when the TMT ratio was above 1.5 and downregulated when the TMT ratio was lower than 0.66 in biofilm growth compared to planktonic growth with a significant  $p$ -value < 0.05. Significant differentially expressed proteins (>2-fold) were determined by using VENNY (v.2.1) (<http://bioinfogp.cnb.csic.es/tools/venny/>, accessed on 25 June 2018) and processed further to gain more functional insights. Metabolic pathways of identified proteins were analysed by using the Kyoto Encyclopedia of

Genes and Genomes (KEGG) mapper ([https://www.genome.jp/kegg/tool/map\\_pathway2.html](https://www.genome.jp/kegg/tool/map_pathway2.html), accessed on 6 August 2018). Subcellular localisation of identified proteins was analysed by using PSORTb (version 3.0.2) (<http://www.psort.org/psortb/index.html>, accessed on 23 January 2018). The protein-protein interaction (PPI) network of significantly differentially expressed proteins was analysed by STRING software v.10.0 (<http://string-db.org/>, accessed on 25 June 2018).

## Supplementary Tables

**Table S1.** Functional classification of significantly upregulated proteins (> 2-fold) common in biofilm compared to planktonic culture (P<0.05).

| Protein Pathways                                                                                                                                          | Accession ID | Protein Name                              | Gene Name      | Fold change |        |      | Subcellular Localisation |
|-----------------------------------------------------------------------------------------------------------------------------------------------------------|--------------|-------------------------------------------|----------------|-------------|--------|------|--------------------------|
|                                                                                                                                                           |              |                                           |                | 3-day       | 12-day | DSB  |                          |
| Purine metabolism                                                                                                                                         | AIO20958.1   | guanosine 5'-monophosphate oxidoreductase | guaC SACOL1371 | 2.28        | 3.28   | 2.97 | Cytoplasmic              |
|                                                                                                                                                           | AIO21316.1   | hypothetical protein KQ76_08470           | SAS049         | 3.38        | 2.21   | 2.21 | Unknown                  |
|                                                                                                                                                           | AIO21769.1   | hypothetical protein KQ76_11075           | SA1933         | 2.47        | 2.10   | 2.26 | Cytoplasmic              |
|                                                                                                                                                           | AIO20968.1   | exonuclease                               | sbcD SA1180    | 2.40        | 2.36   | 2.73 | Cytoplasmic              |
| Metabolic pathways, Biosynthesis of secondary metabolites, Biosynthesis of antibiotics, Propanoate metabolism, Valine, leucine and isoleucine degradation | AIO21211.1   | 2-oxoisovalerate dehydrogenase            | bfmBAA         | 3.19        | 2.12   | 2.06 | Cytoplasmic              |
|                                                                                                                                                           | AIO20399.1   | membrane protein                          | SACOL0790      | 4.75        | 3.30   | 3.28 | CM                       |
|                                                                                                                                                           | AIO21578.1   | membrane protein                          | SACOL1947      | 16.46       | 3.88   | 2.99 | CM                       |
| Cationic antimicrobial peptide (CAMP) resistance, <i>Staphylococcus aureus</i> infection, Two-component system                                            | AIO20508.1   | D-alanine transfer protein DltB           | DltB           | 2.10        | 3.02   | 3.20 | CM                       |

**Table S2.** Functional classification of significantly downregulated proteins (> 2-fold) common in biofilm compared to planktonic culture (P<0.05).

| Protein Pathways                                | Accession ID | Protein Name                            | Gene Name       | Fold change |        |      | Subcellular Localisation |
|-------------------------------------------------|--------------|-----------------------------------------|-----------------|-------------|--------|------|--------------------------|
|                                                 |              |                                         |                 | 3-day       | 12-day | DSB  |                          |
|                                                 | AIO20660.1   | chitinase                               | SA0914          | 0.12        | 0.09   | 0.06 | Unknown                  |
| Metabolic pathways, Glycerolipid metabolism     | AIO19987.1   | lipase                                  | lip2 geh SA0309 | 0.24        | 0.14   | 0.10 | Extracellular            |
|                                                 | AIO20583.1   | hypothetical protein KQ76_04610         | SACOL1009       | 0.51        | 0.46   | 0.35 | CM                       |
|                                                 | AIO21549.1   | Fur family transcriptional regulator    | perR SACOL1919  | 0.25        | 0.48   | 0.42 | Cytoplasmic              |
|                                                 | AIO20100.1   | hypothetical protein KQ76_01960         | SA0395          | 0.35        | 0.14   | 0.12 | Unknown                  |
|                                                 | AIO22290.1   | N-acetylmuramoyl-L-alanine amidase      | SACOL2666       | 0.17        | 0.14   | 0.12 | Extracellular            |
| Base excision repair                            | AIO21349.1   | DNA-3-methyladenine glycosylase         | tag             | 0.14        | 0.40   | 0.36 | Unknown                  |
| Metabolic pathways, Glycerolipid metabolism     | AIO22317.1   | lipase                                  | lip1 SA2463     | 0.35        | 0.20   | 0.19 | Extracellular            |
|                                                 | AIO22350.1   | peptidase                               |                 | 0.28        | 0.13   | 0.12 | Extracellular            |
| Two-component system                            | AIO21182.1   | transcriptional regulator               | srrA SA1323     | 0.28        | 0.33   | 0.32 | Cytoplasmic              |
| Metabolic pathways, Aminoacyl-tRNA biosynthesis | AIO20194.1   | glutamyl-tRNA synthetase                | gltX SA0486     | 0.47        | 0.39   | 0.39 | Cytoplasmic              |
|                                                 | AIO21805.1   | uridylyltransferase                     | SA1974          | 0.28        | 0.36   | 0.36 | Cytoplasmic              |
|                                                 | AIO19900.1   | nitric oxide dioxygenase                | SA0231          | 0.47        | 0.34   | 0.35 | Cytoplasmic              |
|                                                 | AIO21508.1   | serine protease                         | splE SACOL1865  | 0.24        | 0.40   | 0.41 | Extracellular            |
|                                                 | OOC90902.1   | calcium-binding protein                 | SACOL1846       | 0.08        | 0.05   | 0.05 | Unknown                  |
| RNA degradation                                 | AIO21274.1   | molecular chaperone DnaK                | dnaK SA1409     | 0.37        | 0.43   | 0.47 | Cytoplasmic              |
| Aminoacyl-tRNA biosynthesis                     | AIO20737.1   | phenylalanine--tRNA ligase              | pheS SA0985     | 0.31        | 0.35   | 0.39 | Cytoplasmic              |
|                                                 | AIO21788.1   | HAD family hydrolase                    | SA1957          | 0.38        | 0.30   | 0.34 | Cytoplasmic              |
|                                                 | AIO20874.1   | 50S ribosomal protein L7                | SA1111          | 0.27        | 0.34   | 0.38 | Unknown                  |
|                                                 | AIO21842.1   | toxin                                   | SACOL2197       | 0.32        | 0.40   | 0.46 | CM                       |
| Bacterial invasion of epithelial cells          | AIO22136.1   | fibronectin-binding protein             | fnbA SA2291     | 0.39        | 0.23   | 0.26 | Cellwall                 |
| Ribosome                                        | AIO21871.1   | 30S ribosomal protein S17               | rpsQ SACOL2230  | 0.21        | 0.04   | 0.04 | Cytoplasmic              |
|                                                 | AIO22096.1   | chloramphenicol resistance protein DHA1 | SA2241          | 0.31        | 0.21   | 0.18 | CM                       |

|                                         |            |                                               |                |      |      |      |               |
|-----------------------------------------|------------|-----------------------------------------------|----------------|------|------|------|---------------|
|                                         | OOC94196.1 | hypothetical protein BWO94_03305              |                | 0.17 | 0.13 | 0.07 | Unknown       |
|                                         | AIO20603.1 | 2', 3'-cyclic nucleotide 2'-phosphodiesterase | SACOL1031      | 0.28 | 0.18 | 0.17 | Cytoplasmic   |
|                                         | AIO22141.1 | MerR family transcriptional regulator         | SACOL2517      | 0.28 | 0.39 | 0.51 | Unknown       |
| Metabolic pathways, Folate biosynthesis | AIO20380.1 | 7-cyano-7-deazaguanine synthase               | queC SA0667    | 0.34 | 0.50 | 0.48 | Cytoplasmic   |
|                                         | AIO19755.1 | ATPase AAA                                    |                | 0.30 | 0.27 | 0.21 | CM            |
| <i>Staphylococcus aureus</i> infection  | AIO20758.1 | fibrinogen-binding protein                    | fib efb SA1003 | 0.47 | 0.27 | 0.29 | Extracellular |
|                                         | AIO21801.1 | multidrug MFS transporter                     | SA1970         | 0.44 | 0.24 | 0.17 | CM            |

**Table S3.** Functional classification of significantly upregulated proteins (> 2-fold) common in 3-day and 12-day hydrated biofilm compared to planktonic culture (P<0.05).

| Protein Pathways                                                                                                                          | Accession ID | Protein Name                                                                 | Gene Name         | Fold Change |        | Subcellular Localisation |
|-------------------------------------------------------------------------------------------------------------------------------------------|--------------|------------------------------------------------------------------------------|-------------------|-------------|--------|--------------------------|
|                                                                                                                                           |              |                                                                              |                   | 3-day       | 12-day |                          |
|                                                                                                                                           | AIO20486.1   | UPF0337 protein SA0772                                                       | SA0772            | 5.09        | 2.36   | Unknown                  |
|                                                                                                                                           | AIO21982.1   | Uncharacterized protein                                                      | SACOL2344         | 3.3         | 2.32   | Cytoplasmic              |
|                                                                                                                                           | AIO21786.1   | Lytic regulatory protein truncated with Tn554                                | truncated-SA      | 2.89        | 2.02   | CM                       |
| Metabolic pathways, Amino sugar and nucleotide sugar metabolism, Biosynthesis of antibiotics, Alanine, aspartate and glutamate metabolism | AIO21790.1   | Glutamine--fructose-6-phosphate aminotransferase [isomerizing] (EC 2.6.1.16) | glmS<br>SACOL2145 | 2.37        | 2.13   | Cytoplasmic              |

**Table S4.** Functional classification of significantly upregulated proteins (> 2-fold) common in 12-day biofilm and DSB compared to planktonic culture (P<0.05).

| Protein Pathways                                                                                                             | Accession ID | Protein Name                                                                                                                                   | Gene Name         | Fold Change |      | Subcellular Localisation |
|------------------------------------------------------------------------------------------------------------------------------|--------------|------------------------------------------------------------------------------------------------------------------------------------------------|-------------------|-------------|------|--------------------------|
|                                                                                                                              |              |                                                                                                                                                |                   | 12-day      | DSB  |                          |
|                                                                                                                              | AIO22305.1   | Uncharacterized protein                                                                                                                        | SA2451            | 5.52        | 4.40 | Unknown                  |
|                                                                                                                              | AIO22223.1   | Uncharacterized protein                                                                                                                        | SA2371            | 3.59        | 2.46 | Unknown                  |
| Metabolic pathways, Biosynthesis of secondary metabolites, Propanoate metabolism, Valine, leucine and isoleucine degradation | AIO21210.1   | 2-oxoisovalerate dehydrogenase, E1 component, beta subunit (EC 1.2.4.1)                                                                        | SACOL1561         | 3.11        | 3.36 | Cytoplasmic              |
|                                                                                                                              | AIO20294.1   | Na <sup>+</sup> /H <sup>+</sup> antiporter, putative                                                                                           | SACOL0687         | 2.98        | 3.04 | Unknown                  |
|                                                                                                                              | AIO20937.1   | Uncharacterized protein                                                                                                                        | SAS040            | 2.84        | 3.94 | Unknown                  |
|                                                                                                                              | AIO21539.1   | Uncharacterized protein                                                                                                                        | SA1668            | 2.50        | 2.58 | Cytoplasmic              |
| Butanoate metabolism                                                                                                         | AIO19795.1   | Diacetyl reductase [(S)-acetoin forming] (EC 1.1.1.304) (Acetoin(diacetyl) reductase) (AR) (Meso-2,3-butanediol dehydrogenase)                 | butA SA0122       | 2.49        | 2.35 | Cytoplasmic              |
| Metabolic pathways, Pyrimidine metabolism, Alanine, aspartate and glutamate metabolism                                       | AIO20804.1   | Carbamoyl-phosphate synthase small chain (EC 6.3.5.5) (Carbamoyl-phosphate synthetase glutamine chain)                                         | carA pyrAA SA1045 | 2.41        | 2.38 |                          |
| Pantothenate and CoA biosynthesis                                                                                            | AIO21707.1   | Holo-[acyl-carrier-protein] synthase (Holo-ACP synthase) (EC 2.7.8.7) (4'-phosphopantetheinyl transferase AcpS)                                | acpS dpj SA1875   | 2.37        | 3.18 |                          |
|                                                                                                                              | AIO20325.1   | Uncharacterized protein                                                                                                                        | SACOL0715         | 2.35        | 2.18 |                          |
| Ribosome                                                                                                                     | AIO21864.1   | 50S ribosomal protein L18                                                                                                                      | rplR SA2032       | 2.33        | 2.19 | Cytoplasmic              |
| Metabolic pathways, Pyrimidine metabolism                                                                                    | AIO21765.1   | CTP synthase (EC 6.3.4.2) (Cytidine 5'-triphosphate synthase) (Cytidine triphosphate synthetase) (CTP synthetase) (CTPS) (UTP--ammonia ligase) | pyrG ctrA SA1929  | 2.32        | 2.24 | Cytoplasmic              |



|                                                                           |            |                                                                                                                                                                                                                                                                                 |                   |      |      |             |
|---------------------------------------------------------------------------|------------|---------------------------------------------------------------------------------------------------------------------------------------------------------------------------------------------------------------------------------------------------------------------------------|-------------------|------|------|-------------|
| Metabolic pathways,<br>Phosphotransferase system,<br>Galactose metabolism | AIO21825.1 | PTS system lactose-specific EIICB component (EIICB-Lac) (EII-Lac) [Includes: PTS system lactose-specific EIIC component (Lactose permease IIC component); PTS system lactose-specific EIIB component (EC 2.7.1.207) (Lactose-specific phosphotransferase enzyme IIB component)] | lacE<br>SACOL2181 | 2.27 | 2.54 | CM          |
|                                                                           | AIO20268.1 | Uncharacterized protein                                                                                                                                                                                                                                                         | SA0559            | 2.25 | 3.02 | Unknown     |
|                                                                           | AIO20620.1 | Uncharacterized protein                                                                                                                                                                                                                                                         | SACOL1585         | 2.20 | 3.15 | Unknown     |
|                                                                           | AIO19785.1 | Putative ornithine cyclodeaminase                                                                                                                                                                                                                                               | sbnB              | 2.20 | 3.61 |             |
| Ribosome                                                                  | AIO21878.1 | 50S ribosomal protein L23                                                                                                                                                                                                                                                       | rplW SA2045       | 2.15 | 2.41 | Cytoplasmic |
| Ribosome                                                                  | AIO21848.1 | 50S ribosomal protein L13                                                                                                                                                                                                                                                       | rplM SA2017       | 2.14 | 3.28 | Unknown     |
| Metabolic pathways, Pyrimidine metabolism                                 | AIO20807.1 | Orotate phosphoribosyltransferase (OPRT) (OPRTase) (EC 2.4.2.10)                                                                                                                                                                                                                | pyrE SA1048       | 2.13 | 2.30 | Cytoplasmic |
| Ribosome                                                                  | AIO21879.1 | 50S ribosomal protein L4                                                                                                                                                                                                                                                        | rplD SA2046       | 2.03 | 2.33 | Unknown     |
|                                                                           | AIO20666.1 | Phosphoribosylformylglycinamide synthase subunit PurS (FGAM synthase) (EC 6.3.5.3) (Formylglycinamide ribonucleotide amidotransferase subunit III) (FGAR amidotransferase III) (FGAR-AT III) (Phosphoribosylformylglycinamide synthase subunit III)                             | purS SA0919       | 2.01 | 2.09 |             |
|                                                                           | OOC94735.1 | hypothetical protein BWO94_01050                                                                                                                                                                                                                                                |                   | 3.63 | 4.91 | Unknown     |

**Table S5.** Functional classification of significantly downregulated proteins (> 2-fold) common in 3-day and 12-day hydrated biofilm compared to planktonic culture (P<0.05).

| Protein Pathways | Accession ID | Protein Name                    | Gene Name | Fold Change |        | Subcellular Localisation |
|------------------|--------------|---------------------------------|-----------|-------------|--------|--------------------------|
|                  |              |                                 |           | 3-day       | 12-day |                          |
|                  | AIO20515.1   | hypothetical protein KQ76_04260 | SACOL0943 | 0.33        | 0.50   |                          |
|                  | AIO21565.1   | hypothetical protein KQ76_09970 | SAS054    | 0.32        | 0.37   |                          |

**Table S6.** Functional classification of significantly downregulated proteins (> 2-fold) common in 12-day biofilm and DSB compared to planktonic culture (P<0.05).

| Protein Pathways                                                                                                         | Accession ID | Protein Name                      | Gene Name       | Fold Change |      | Subcellular Localisation |
|--------------------------------------------------------------------------------------------------------------------------|--------------|-----------------------------------|-----------------|-------------|------|--------------------------|
|                                                                                                                          |              |                                   |                 | 12-day      | DSB  |                          |
| <i>Staphylococcus aureus</i> infection                                                                                   | AIO20349.1   | hypothetical protein KQ76_03365   | SACOL0741       | 0.30        | 0.25 | Cytoplasmic              |
|                                                                                                                          | AAX11326.1   | Enterotoxin type G (SEG)          | entG seg SA1642 | 0.40        | 0.41 | Extracellular            |
|                                                                                                                          | AIO20626.1   | Uncharacterized protein           | SACOL1579       | 0.27        | 0.25 | CM                       |
|                                                                                                                          | AIO20189.1   | excinuclease ABC subunit B        | SA0481          | 0.36        | 0.40 | Cytoplasmic              |
|                                                                                                                          | AIO20628.1   | Uncharacterized protein           | SACOL1577       | 0.46        | 0.50 | CM                       |
| Metabolic pathways, Galactose metabolism, Phosphotransferase system (PTS)                                                | AIO22180.1   | SA2330 protein                    | SA2330          | 0.34        | 0.32 | Cytoplasmic              |
|                                                                                                                          | AIO19907.1   | PTS sugar transporter subunit IIA | SA0236          | 0.24        | 0.29 | Cytoplasmic              |
|                                                                                                                          | AIO20451.1   | SA0734 protein                    | SA0734          | 0.45        | 0.35 | Cytoplasmic              |
|                                                                                                                          | AIO21128.1   | hypothetical protein KQ76_07495   |                 | 0.35        | 0.28 | Cytoplasmic              |
|                                                                                                                          | AIO20578.1   | Competence protein, putative      | SACOL1004       | 0.32        | 0.29 | Cytoplasmic              |
| Metabolic pathways, Microbial metabolism in diverse environments, Purine metabolism, Arginine biosynthesis               | AIO20988.1   | SA1196 protein                    | SA1196          | 0.23        | 0.27 | Cytoplasmic              |
|                                                                                                                          | AIO21919.1   | urease subunit gamma              | ureA SA2082     | 0.35        | 0.45 | Cytoplasmic              |
|                                                                                                                          |              |                                   |                 |             |      |                          |
| Metabolic pathways, Purine metabolism, Pyrimidine metabolism                                                             | AIO20222.1   | deoxycytidine kinase              | SA0514          | 0.43        | 0.50 | Cytoplasmic              |
| Metabolic pathways, DNA replication, Pyrimidine metabolism, Purine metabolism, Homologous recombination, Mismatch repair | AIO21618.1   | hypothetical protein KQ76_10250   | SAS056          | 0.46        | 0.44 |                          |
|                                                                                                                          | AIO20145.1   | DNA polymerase III subunit delta' | SACOL0526       | 0.31        | 0.34 | Cytoplasmic              |
|                                                                                                                          |              |                                   |                 |             |      |                          |

|                                        |            |                              |                                  |      |      |               |
|----------------------------------------|------------|------------------------------|----------------------------------|------|------|---------------|
|                                        | AIO21816.1 | Uncharacterized protein      | SA1983                           | 0.17 | 0.25 | Cytoplasmic   |
|                                        | AIO21983.1 | esterase                     | SA2140                           | 0.48 | 0.44 | Cytoplasmic   |
|                                        | AIO22015.1 | SA2166 protein               | SA2166                           | 0.43 | 0.28 | CM            |
|                                        | AIO20581.1 | Uncharacterized protein      | SA0861                           | 0.38 | 0.39 | CM            |
|                                        | AIO22174.1 | thioredoxin                  | SA2324                           | 0.42 | 0.47 | Cytoplasmic   |
| Two-component system                   | AIO21715.1 | Sensor protein KdpD          | kdpD                             | 0.39 | 0.40 | CM            |
|                                        | AIO20099.1 | Uncharacterized protein      | SA0394                           | 0.30 | 0.25 | Unknown       |
| <i>Staphylococcus aureus</i> infection | AIO21515.1 | Staphylococcal enterotoxin B | seb<br>SACOL0907                 | 0.34 | 0.23 | Extracellular |
| Ribosome                               | AIO21867.1 | 30S ribosomal protein S14    | rpsZ rpsN1<br>SA2034.1<br>SAS079 | 0.26 | 0.29 | Cytoplasmic   |

**Table S7.** Sodium hypochlorite efficacy testing against *S. aureus* in planktonic and three different biofilm growth mode.

|                   |                              | <b>Residual</b> | <b>STDEV</b> | <b>Average</b>   | <b>STDEV</b> |
|-------------------|------------------------------|-----------------|--------------|------------------|--------------|
|                   | Chlorine (mg/L) <sup>#</sup> | CFU<br>(Log10)  |              | Log<br>reduction |              |
| Planktonic        | 500                          | 0               | 0            | 6.958            | 0.0          |
|                   | 250                          | 3.117           | 0.037        | 3.841            | 0.037        |
|                   | 100                          | 3.825           | 0.056        | 3.133            | 0.056        |
|                   | 50                           | 4.929           | 0.042        | 2.029            | 0.042        |
| 3-day<br>biofilm  | 1000                         | 0               | 0            | 7.161            | 0.0          |
|                   | 500                          | 4.043           | 0.139        | 3.117            | 0.139        |
|                   | 250                          | 4.698           | 0.014        | 2.462            | 0.014        |
|                   | 100                          | 5.801           | 0.108        | 1.359            | 0.108        |
| 12-day<br>biofilm | 2000                         | 0.000           | 0.000        | 7.233            | 0.0          |
|                   | 1000                         | 3.406           | 0.054        | 3.825            | 0.054        |
|                   | 500                          | 4.673           | 0.053        | 2.558            | 0.053        |
|                   | 250                          | 5.539           | 0.030        | 1.692            | 0.030        |
| 12-day DSB        | 5000                         | 0.000           | 0.000        | 7.052            | 0.0          |
|                   | 2000                         | 4.209           | 0.130        | 2.842            | 0.130        |
|                   | 1000                         | 4.744           | 0.018        | 2.307            | 0.018        |
|                   | 500                          | 5.516           | 0.022        | 1.535            | 0.022        |

<sup>#</sup> Disinfectant contact time was 5 min, disinfectant concentration is expressed as free chlorine levels (mg/L).
